# Supplementary material for: TagBiFC technique allows long-term single-molecule tracking of protein-protein interactions in living cells
Source: PubMed Central journal article supplement (PMC7979928; doi:10.1038/s42003-021-01896-7), 2021-03-19
Supplement: 42003_2021_1896_MOESM1_ESM.pdf [file 42003_2021_1896_MOESM1_ESM.pdf]

## Supplementary Information

### TagBiFC technique allows long-term single-molecule tracking of protein-protein interactions in living cells

*Shipeng Shao<sup>1,2</sup>, Hongchen Zhang<sup>1</sup>, Yong Zeng<sup>2</sup>, Yongliang Li<sup>1,3</sup>, Chaoying Sun<sup>1</sup>,  
Yujie Sun<sup>1,\*</sup>*

*<sup>1</sup> State Key Laboratory of Membrane Biology, Biomedical Pioneering Innovation Center (BIOPIC), School of Life Sciences, Peking University, Beijing 100871, China.*

*<sup>2</sup> Beijing Institute of Heart Lung and Blood Vessel Disease, Beijing Anzhen Hospital, Capital Medical University, Beijing, 100029, China*

*<sup>3</sup> The second Dental Center, Peking University School and Hospital of Stomatology, Beijing 100871, China.*

*\*E-mail: sun\_yujie@pku.edu.cn*

Query=HaloTag      Subject=DhaA       potential split sites       Enzymatic center

Range 1: 2 to 293 [Graphics](#)      ▼ Next Match    ▲ Previous Match

| Score          | Expect | Method                                                         | Identities   | Positives    | Gaps      |
|----------------|--------|----------------------------------------------------------------|--------------|--------------|-----------|
| 555 bits(1429) | 0.0    | Compositional matrix adjust.                                   | 270/292(92%) | 279/292(95%) | 0/292(0%) |
| Query 3        |        | SEIGTGFPFDPHYVEVLGERMHYVDVGPRTGTPVLFLHGNPTSSYVWRNIIPHVAIPTHRC  | 62           |              |           |
| Sbjct 2        |        | SEIGTGFPFDPHYVEVLGERMHYVDVGPRTGTPVLFLHGNPTSSYVWRNIIPHVAIPTHRC  | 61           |              |           |
| Query 63       |        | IAPDLIGMGKSDKPDLYFFDDHVRFMDFEALGIEEVVLVIHWDGWSALGFHWAKRNPE     | 122          |              |           |
| Sbjct 62       |        | IAPDLIGMGKSDKPDLYFFDDHVRFMDFEALGIEEVVLVIHWDGWSALGFHWAKRNPE     | 121          |              |           |
| Query 123      |        | RVKGIAMFIFIRPIPTWDEWPEFARETFQAFRTIDVGRKLIIDQNVFIEGTLPMGVVRPL   | 182          |              |           |
| Sbjct 122      |        | RVKGIAMFIFIRPIPTWDEWPEFARETFQAFRTIDVGRKLIIDQNVFIEGTLPMGVVRPL   | 181          |              |           |
| Query 183      |        | TEVEMDHYREPFLNPVDREPLWRFEENELPIAGEPANIVALVEEYMDWLHQSEVVPKLLFWG | 242          |              |           |
| Sbjct 182      |        | TEVEMDHYREPFLNPVDREPLWRFEENELPIAGEPANIVALVEEYMDWLHQSEVVPKLLFWG | 241          |              |           |
| Query 243      |        | TEGVLIPPAEAARLAESLQENCKAVDIPGLNLLQEDNPDLIGSEIARWLSTL 294       |              |              |           |
| Sbjct 242      |        | TEGVLIPPAEAARLAESLQENCKAVDIPGLNLLQEDNPDLIGSEIARWLSTL 293       |              |              |           |

**Supplementary Figure 1. The sequence alignment of HaloTag and DhaA.**

The Query sequence is HaloTag and the subject sequence is DhaA. The enzymatic center consisting of three amino acids were boxed in green. The potential split sites of HaloTag were boxed in blue. Each of the split sites were in flexible loops between two secondary structures units according to the three-dimensional crystal structure.

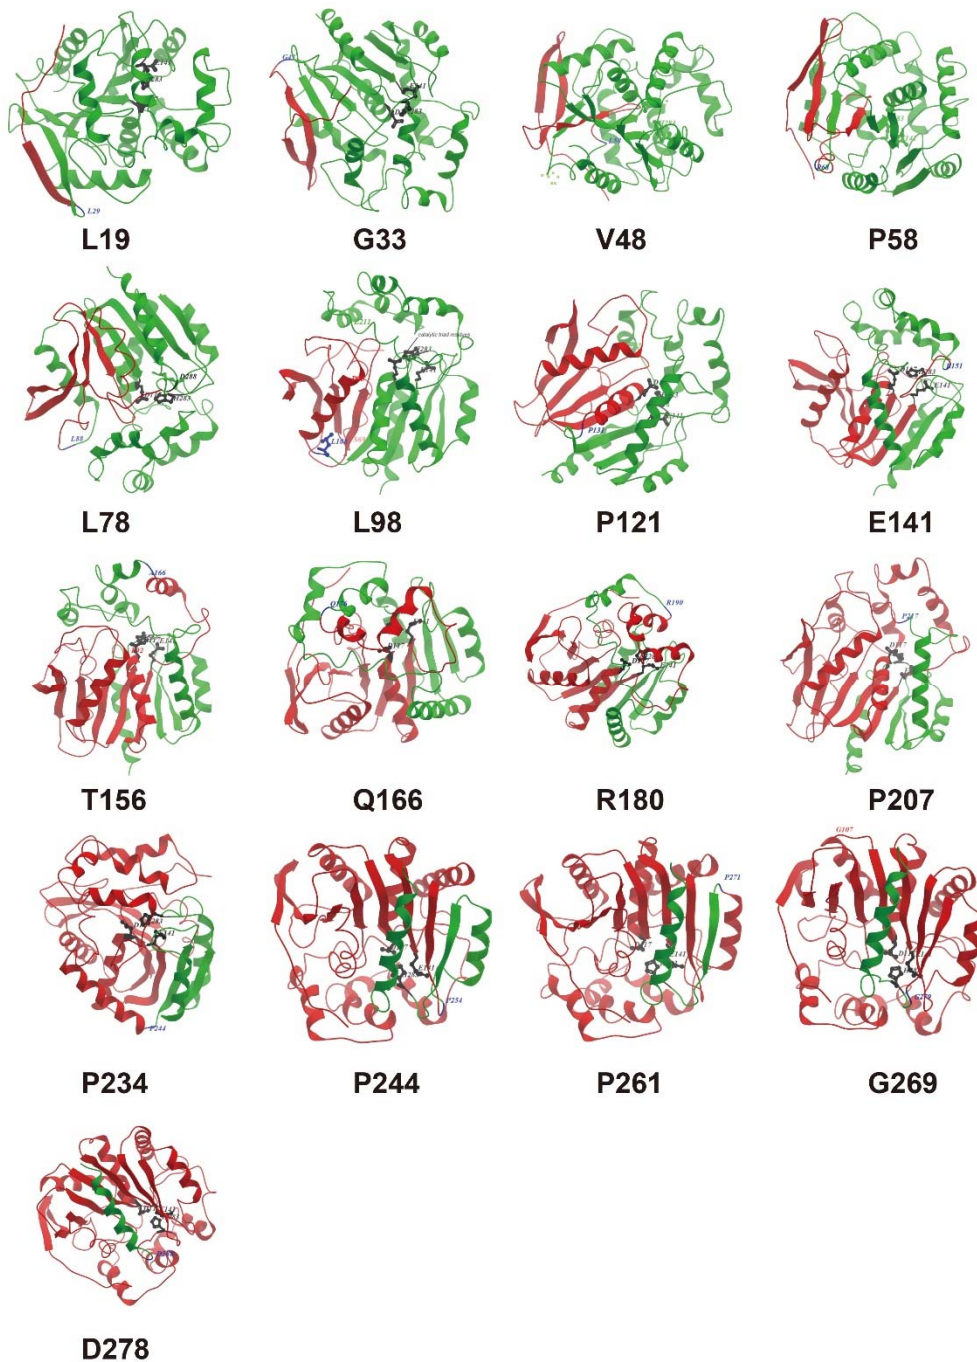

**Supplementary Figure 2. Three-dimensional structure diagram of all the 17 split sites of HaloTag.**

The displayed structures are haloalkane dehalogenase DhaA (1BN6). The labeled split site in the images are number form haloalkane dehalogenase DhaA. The words under each figure are number form HaloTag. Three amino acids that make up the enzymatic center are labeled in gray. The N terminal of the split protein is labeled in green while the C terminal of the split protein is labeled in red.

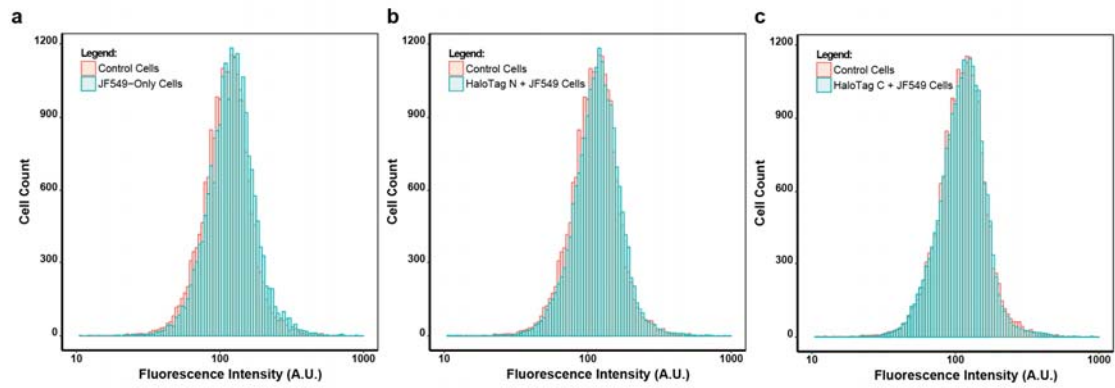

**Supplementary Figure 3. Neither HaloTag N58 nor HaloTag C58 has residual enzymatic activity.**

Cells without HaloTag (**a**), or with HaloTag N58 (**b**), or HaloTag C58 (**c**) expression were kept in medium containing 0.1 nM JF549 for 15 minutes and then washed with PBS for 3 times. Control cells were treated with equal amount DMSO. Whole-cell fluorescence intensity was analyzed using FACS. The nearly identical fluorescence intensity of these two groups demonstrated that the JF549 dye was not retained in cells without HaloTag. The super membrane permeability of JF549 dye is the guarantee for the successful single molecule imaging in the following experiments since single molecule detection is more sensitive to background fluorescence.

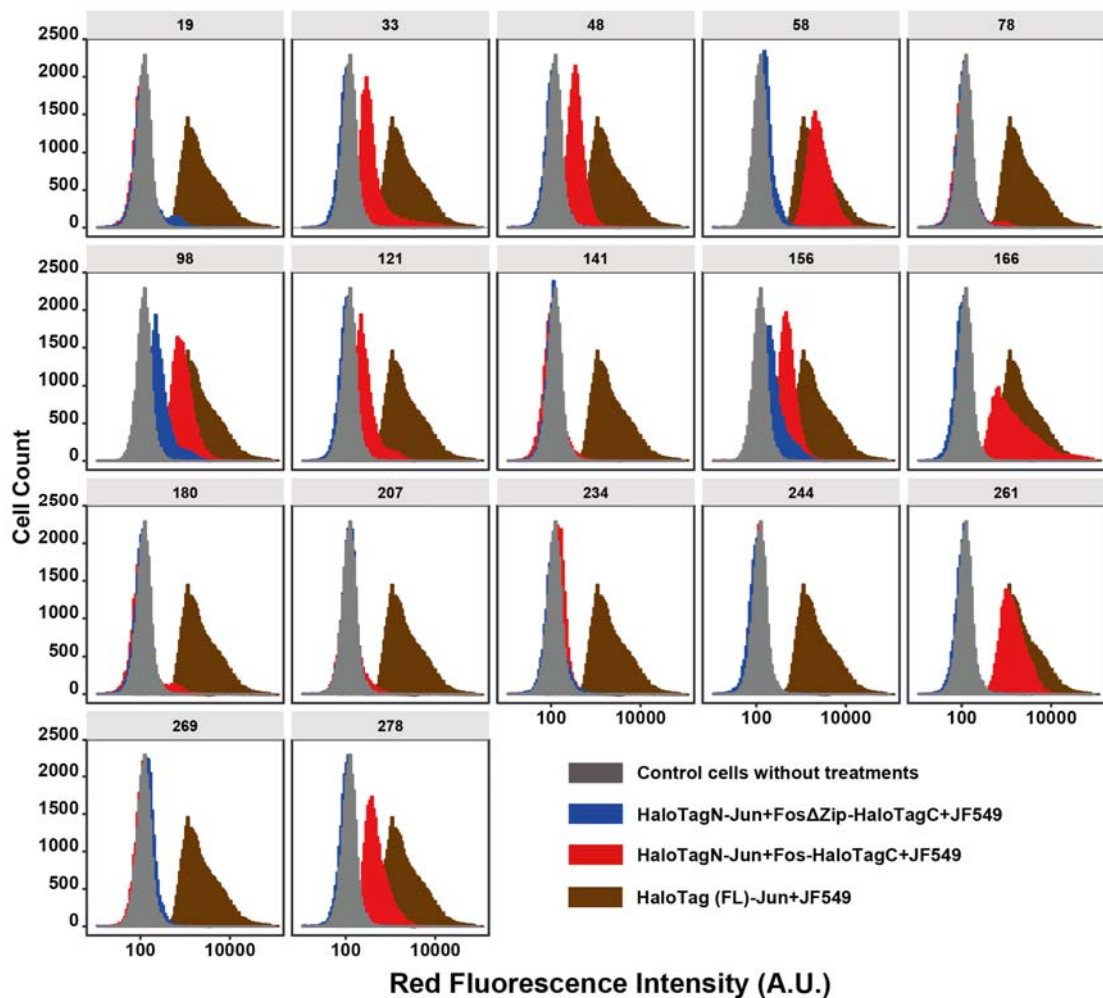

**Supplementary Figure 4. Fluorescent intensity retained within cells of different split sites.**

For all the potential split sites, interaction protein pair Fos and Jun, not interaction pair Fos ( $\Delta$ ZIP) and Jun were fused with split HaloTag, respectively. Cells were kept in medium containing 0.1 nM JF549 for 15 minutes and then washed with PBS for 3 times. All the data were collected using FACS. Blank cells and cells transfection with full-length (FL) HaloTag were used as controls. Fluorescent intensity of more than 10000 cells were collected in one experiment.

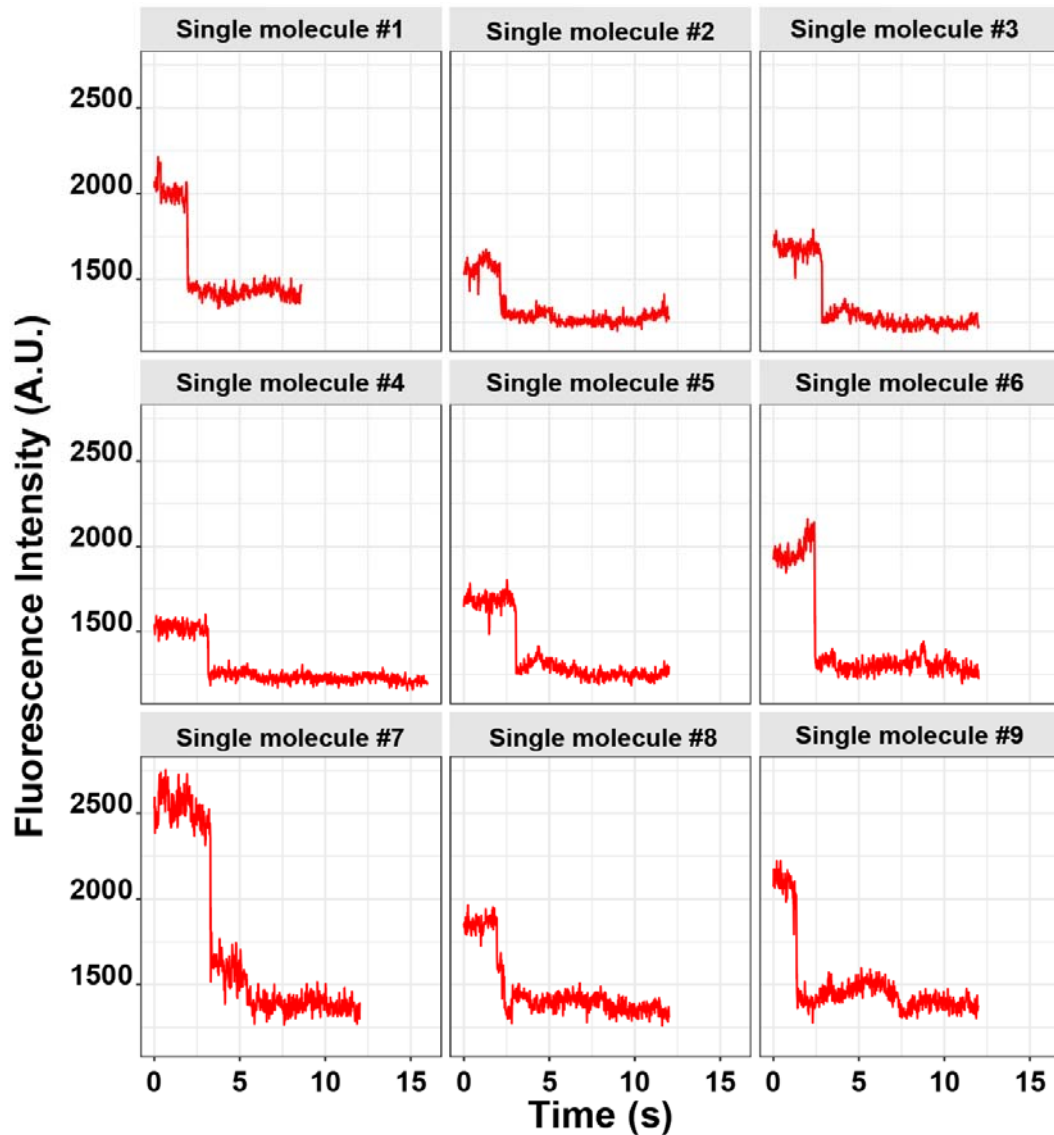

**Supplementary Figure 5. The reconstituted split HaloTag remains single molecule property.**

Fluorescent intensity of nine random chosen molecules. All nine molecules displayed only one plunge during the image acquisition. One single step photo-bleaching of the intensity also indicated that they were indeed single molecules.

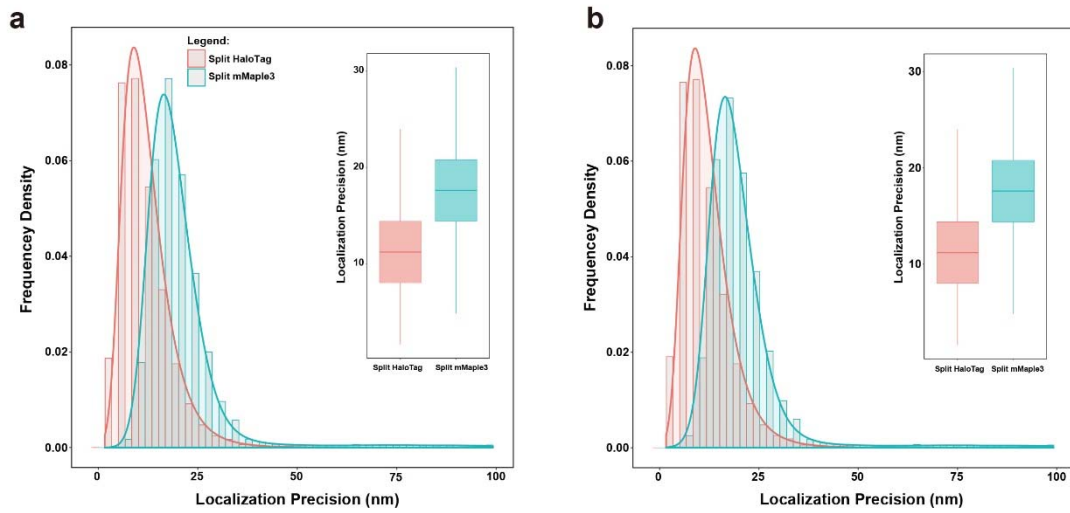

**Supplementary Figure 6. Comparison of single molecule localization precision of split HaloTag and split mMaple3.**

**(a).** Histogram of x localization precision of split HaloTag and split mMaple3. Inset is the boxplot of the same data.

**(b).** Histogram of y localization precision of split HaloTag and split mMaple3. Inset is the boxplot of the same data.



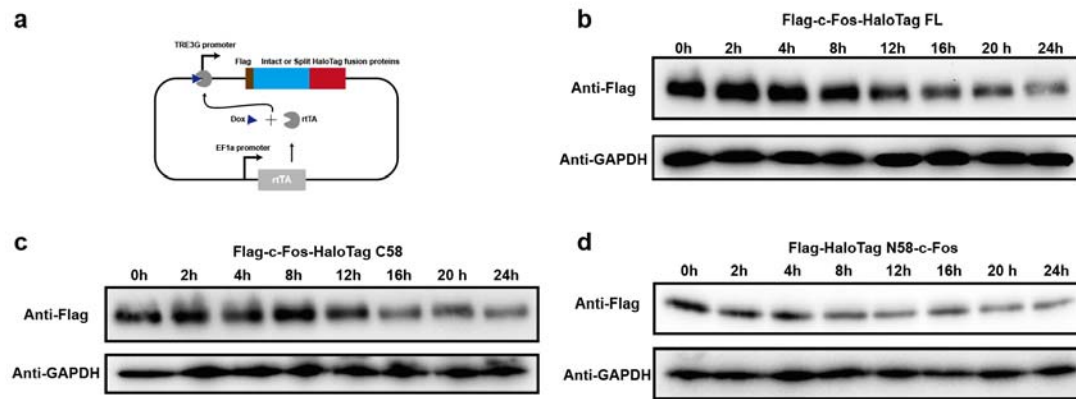

**Supplementary Figure 7. Comparison of stability of intact HaloTag and split HaloTag.**

**(a).** Schematic of expression plasmid of intact HaloTag and split HaloTag. Two expression cascades were cloned into one plasmid to ensure the co-appearance in the same cells. The rtTA was driven by EF1a promoter while the intact HaloTag or split HaloTag fusion proteins was driven by tetracycline responsible element (TRE) promoter. Flag tag (DYKDDDDK) was also fused to the N-terminal of all the proteins for the convenience of detection using western blot.

**(b-d).** Western blot showing the decay process of intact or split HaloTag fusion proteins. HeLa cells were transfected with the corresponding constructs for 24 h. After the induction using 10  $\mu\text{g/ml}$  Doxycycline Hyclate for 6 h, Doxycycline was withdrawn to shut down the expression of intact HaloTag and split HaloTag. Then we tracked the level of intact HaloTag and split HaloTag using western blot at different time point.



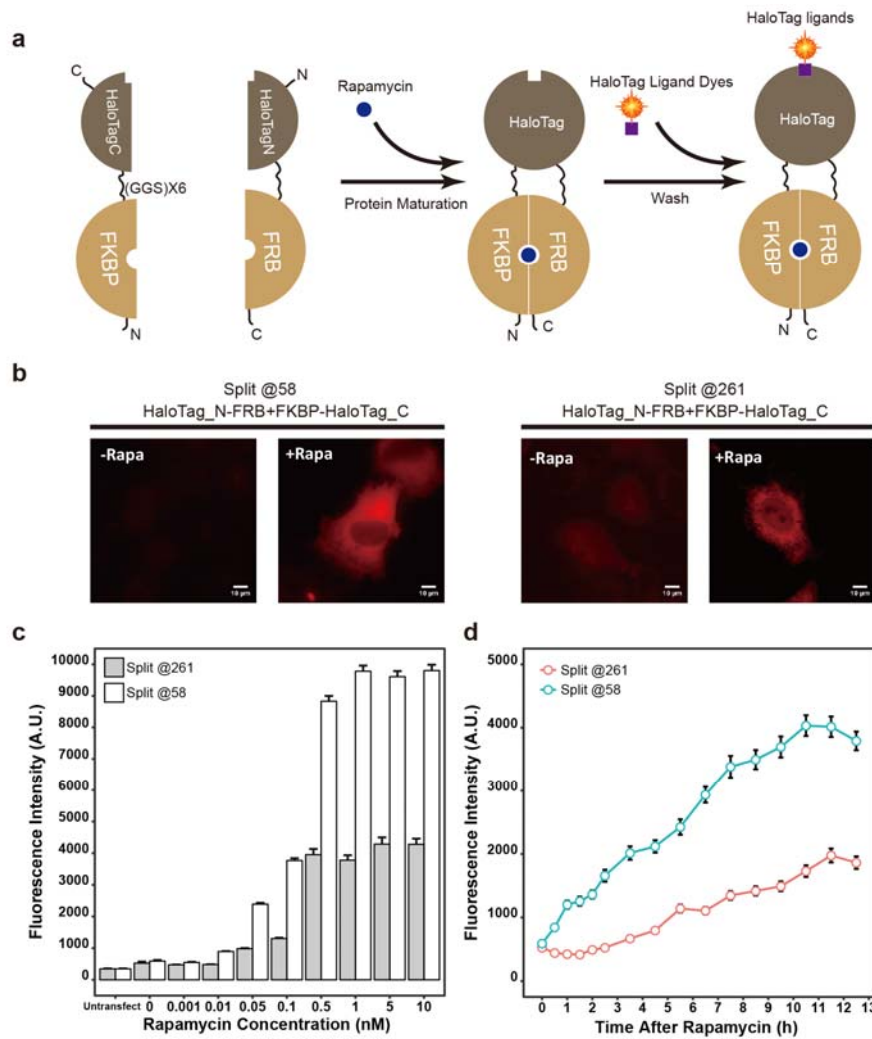

**Supplementary Figure 8. Measure the maturation process of split HaloTag.**

**(a).** Schematic diagram for the measurement of split HaloTag maturation. FKBP and FRB were fused with split HaloTag respectively. When Rapamycin is added to the cells, the split HaloTag will form intact HaloTag and bind its ligand.

**(b).** Fluorescence images of FKBP and FRB fused with split HaloTag at 58 or 261 split sites with or without Rapamycin.

**(c).** The BiFC efficiency of split HaloTag at 58 or 261 split sites under different Rapamycin concentrations. The data were generated using FACS and more than 10000 cells were collected in one experiment. Error bars represent standard deviation (SD) of three independent experiments.

**(d).** The BiFC efficiency of split HaloTag at 58 or 261 split sites as a function of induction time under fixed Rapamycin concentration (0.5 nM). The data were generated using FACS and more than 10000 cells were collected in one experiment. Error bars represent standard deviation (SD) of three independent experiments.

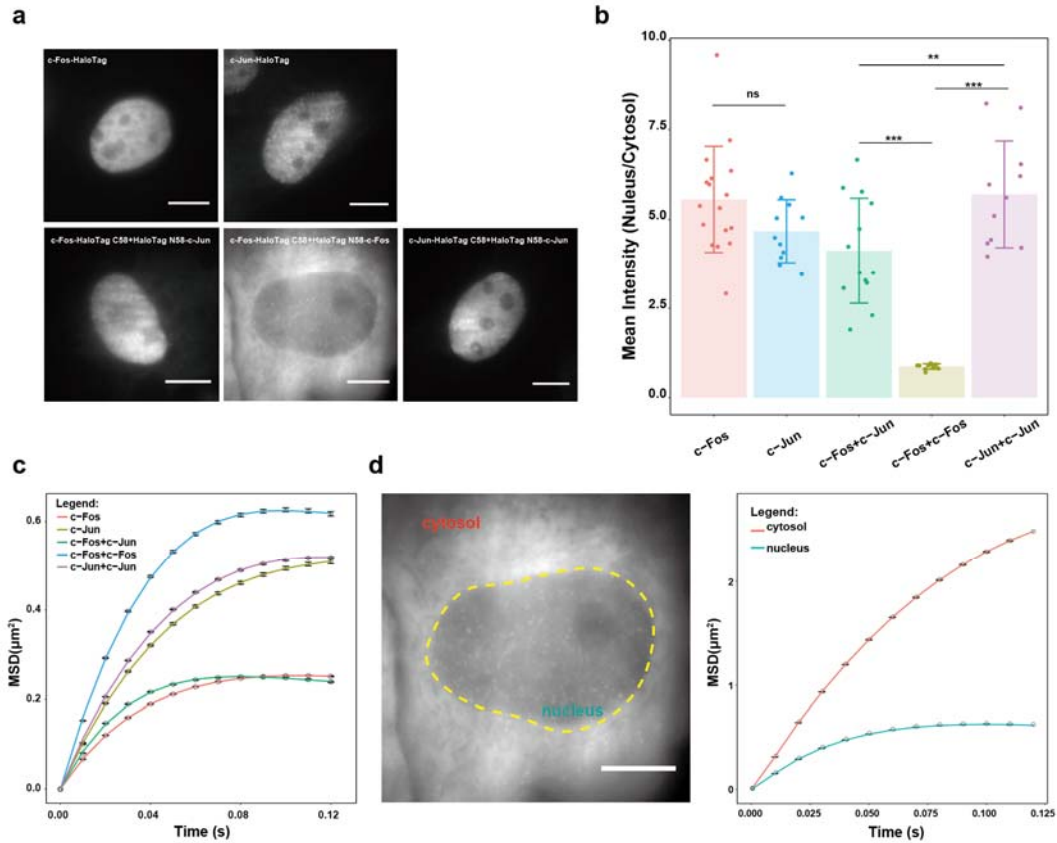

**Supplementary Figure 9. Both c-Fos and c-Jun can form dimer in living cells.**

**(a).** Fluorescence images of c-Fos and c-Jun homodimers and heterodimers. c-Fos or c-Jun fused with intact HaloTag were shown in the upper panel while c-Fos homodimer, c-Jun homodimer, and c-Fos+c-Jun heterodimer labeled using split HaloTag were shown in the lower panel. All scale bars are 5  $\mu\text{m}$ .

**(b).** Nuclear enrichment index (Nucleus/Cytosol fluorescence intensity) of different c-Fos and c-Jun dimers in living cells. \*\*Statistically significant difference ( $P < 0.01$ , paired t test). \*\*\*Statistically significant difference ( $P < 0.001$ , paired t test). ns, non-significant.

**(c).** Single molecule mean square displacement of different c-Fos and c-Jun dimers in living cells. Error bars represent standard deviation (SD). The data were fit by power law function  $MSD = A * t^a$ .

**(d).** Left panel: Fluorescence image of c-Fos and c-Jun heterodimer labeled by split HaloTag. The scale bar is 5  $\mu\text{m}$ . Right Panel: Single molecule mean square displacement of c-Fos and c-Jun heterodimer in the nucleus and in the cytosol. Error bars represent standard deviation (SD). The data were fit by power law function  $MSD = A * t^a$ .

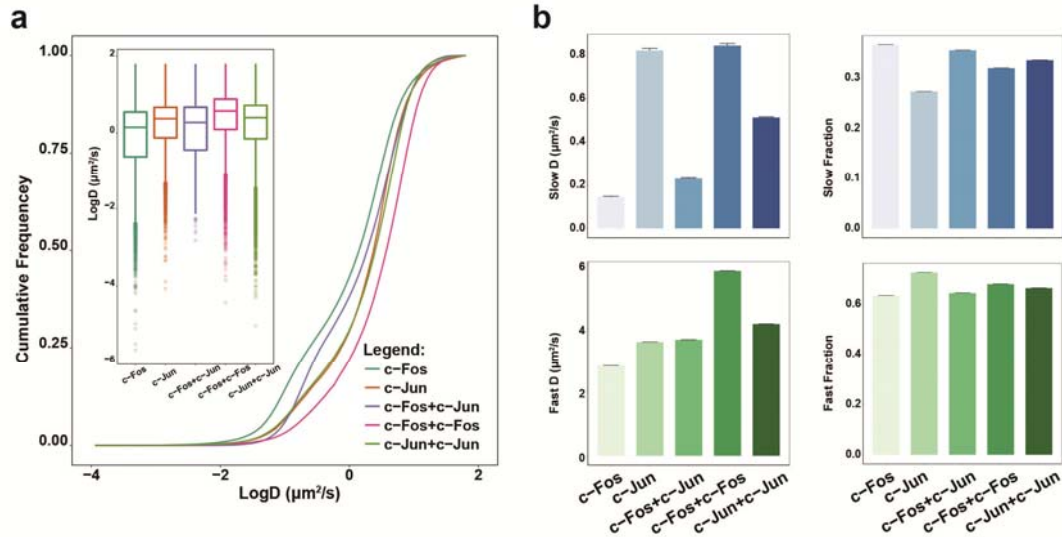

**Supplementary Figure 10. Diffusion behaviors of different c-Fos and c-Jun combinations.**

**(a).** Cumulative distribution of diffusion constant ( $D$ ) of combinations of c-Fos and c-Jun dimers. Inset showed the boxplot of the same data.

**(b).** Fast and slow diffusion constant ( $D$ ) and fraction of combinations of c-Fos and c-Jun dimers. The data were generated by fitting the distribution of diffusion constant with two components Gaussian function. Error bars represent 95% confidence interval of the fitting.

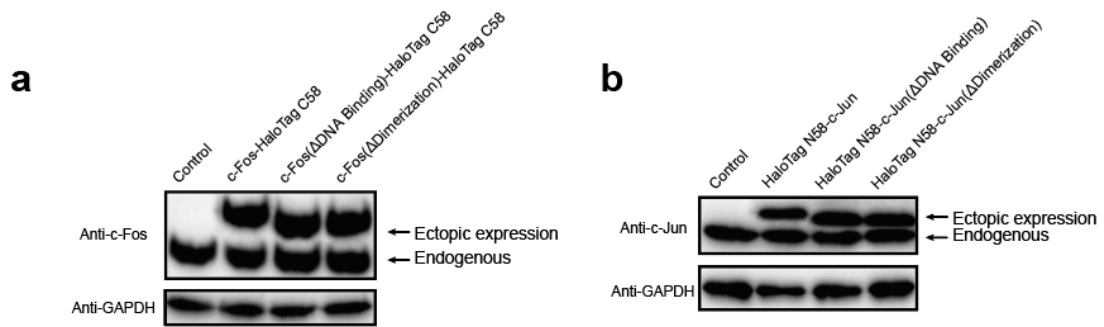

**Supplementary Figure 11. The expression level of ectopic TagBiFC labeled proteins were similar to the endogenous ones.**

Western blot showing that TagBiFC fusion c-Fos (a) and c-Jun (b) have similar expression level to endogenous c-Fos and c-Jun. HeLa cells were transfected with the corresponding constructs for 24 h before western blot was performed. The untransfected cells were used as control.

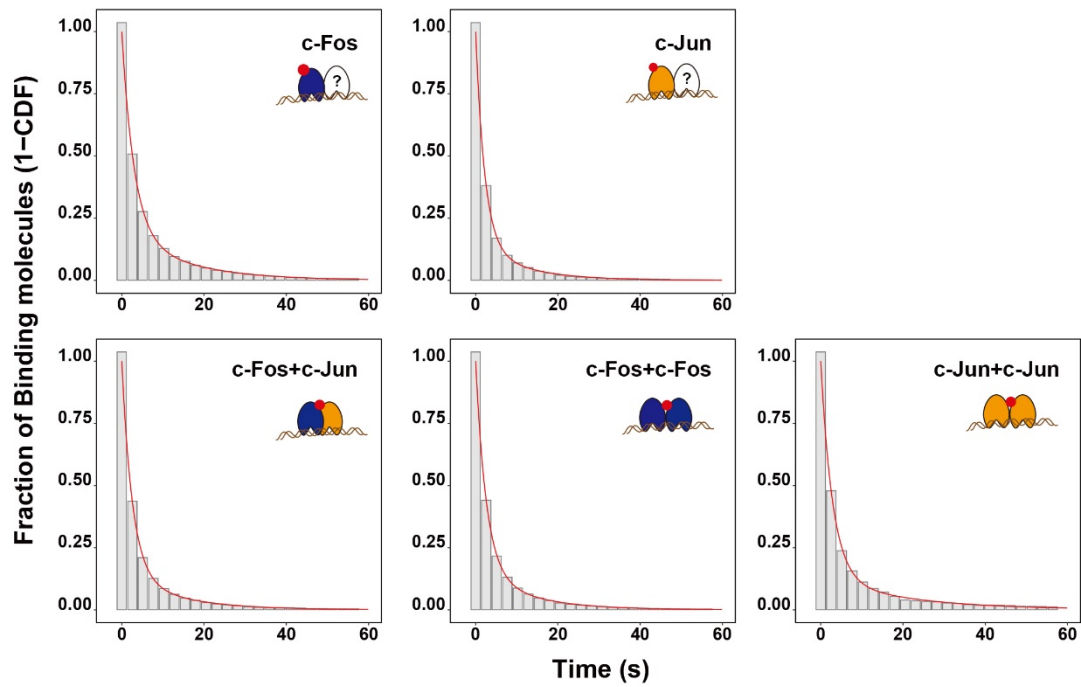

**Supplementary Figure 12. Residence time of different c-Fos and c-Jun combinations.**

c-Fos and c-Jun were fused with intact HaloTag while c-Fos homodimer, c-Jun homodimer, and c-Fos+c-Jun heterodimer were labeled using split HaloTag. The data were fit by two components exponential decay function.

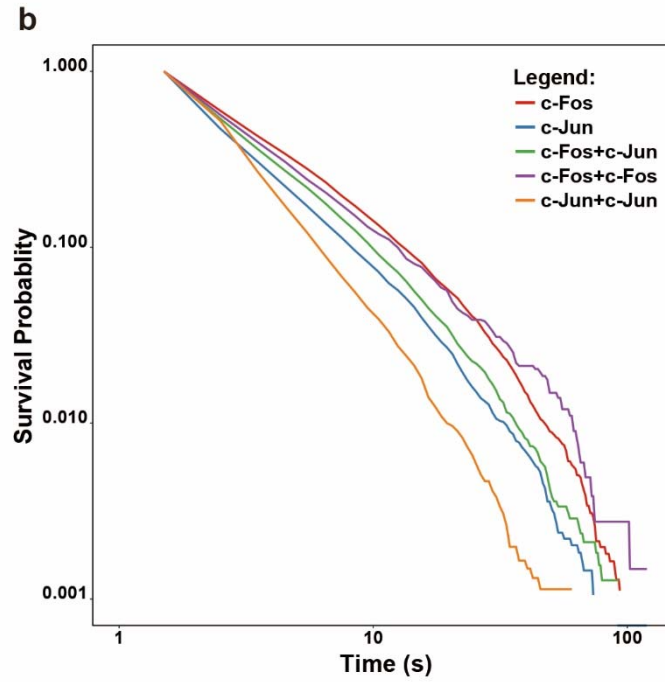

**Supplementary Figure 13. Survival probability of different c-Fos and c-Jun combinations.**

c-Fos or c-Jun were fused with intact HaloTag while c-Fos homodimer, c-Jun homodimer, and c-Fos+c-Jun heterodimer were labeled using split HaloTag.

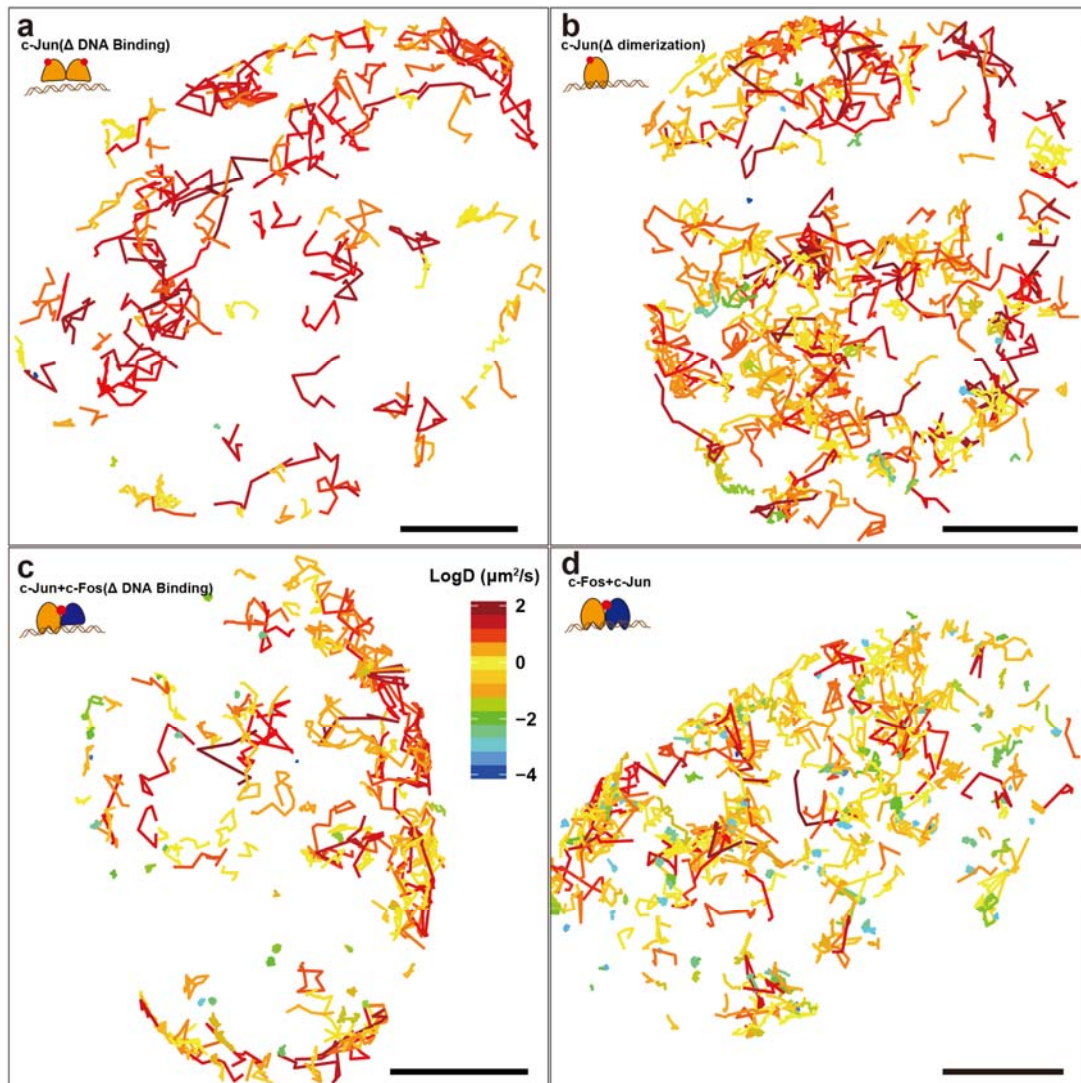

**Supplementary Figure 14. Single molecule trajectories of different c-Jun mutants.**

**(a).** Single molecule trajectories of c-Jun mutant incapable of binding to DNA but capable of forming dimer.

**(b).** Single molecule trajectories of c-Jun mutant incapable of forming dimer but capable of binding to DNA.

**(c).** c-Fos incapable of binding to DNA was forced to form dimer with c-Jun using split HaloTag.

**(d).** Wild type c-Fos was forced to form dimer with c-Jun using split HaloTag. The color of the trajectories represented different diffusion constants.



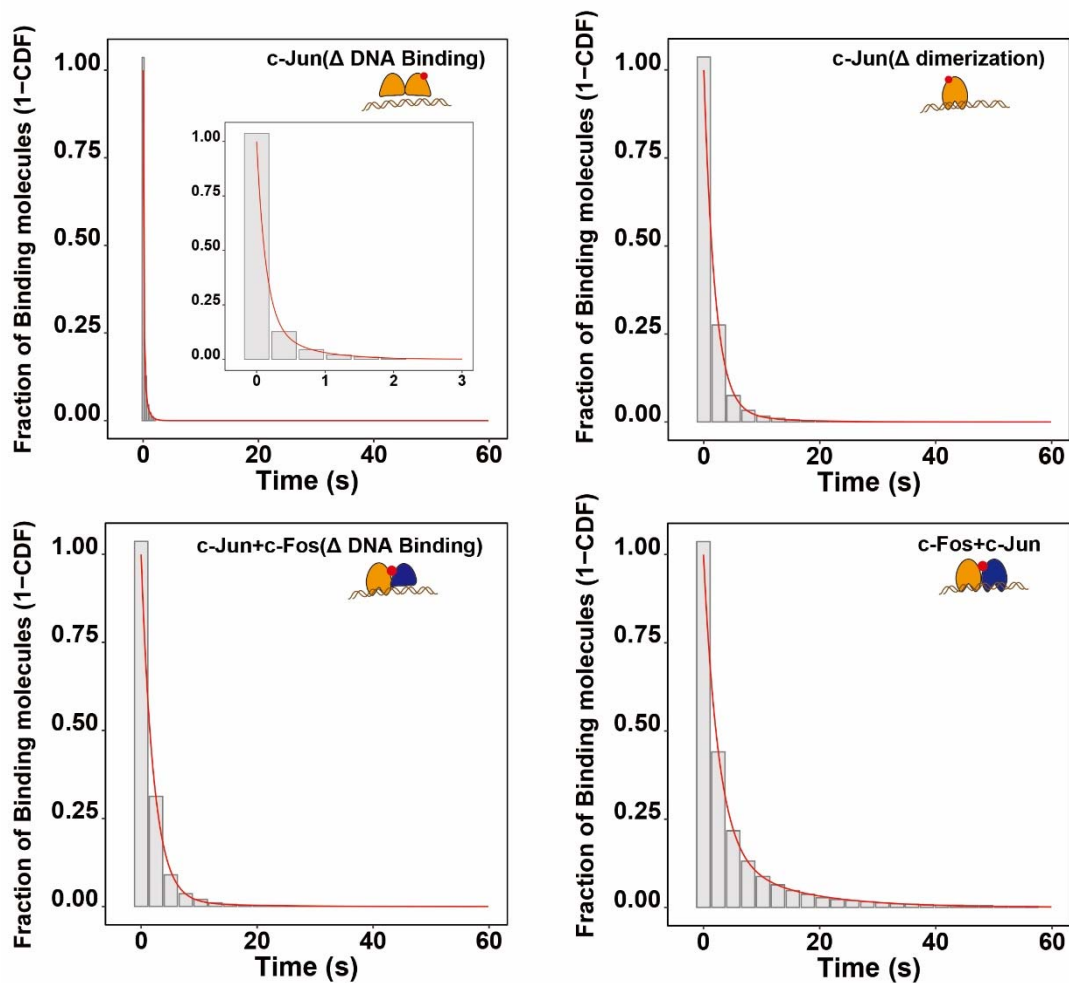

**Supplementary Figure 15. Residence time of different c-Jun mutants.**

c-Jun mutant incapable of binding to DNA but capable of forming dimer was fused with intact HaloTag. c-Jun mutant incapable of forming dimer but capable of binding to DNA was fused with intact HaloTag. c-Fos incapable of binding to DNA was forced to form dimer with c-Jun using split HaloTag. Wild type c-Fos was forced to form dimer with c-Jun using split HaloTag.

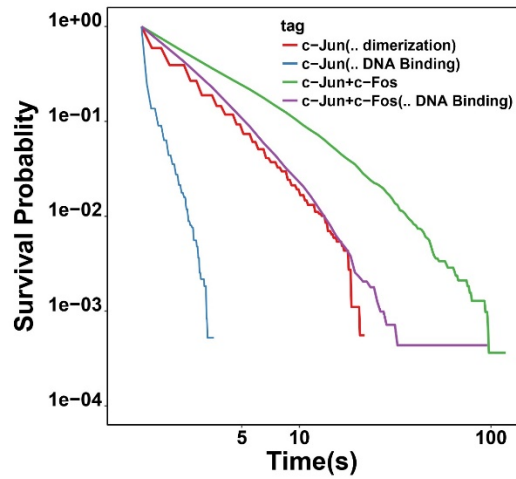

**Supplementary Figure 16. Survival probability of different c-Jun mutants.**

c-Jun mutant incapable of binding to DNA but capable of forming dimer was fused with intact HaloTag. c-Jun mutant incapable of forming dimer but capable of binding to DNA was fused with intact HaloTag. c-Fos incapable of binding to DNA was forced to form dimer with c-Jun using split HaloTag. Wild type c-Fos was forced to form dimer with c-Jun using split HaloTag. The color of the trajectories represented different diffusion constant.

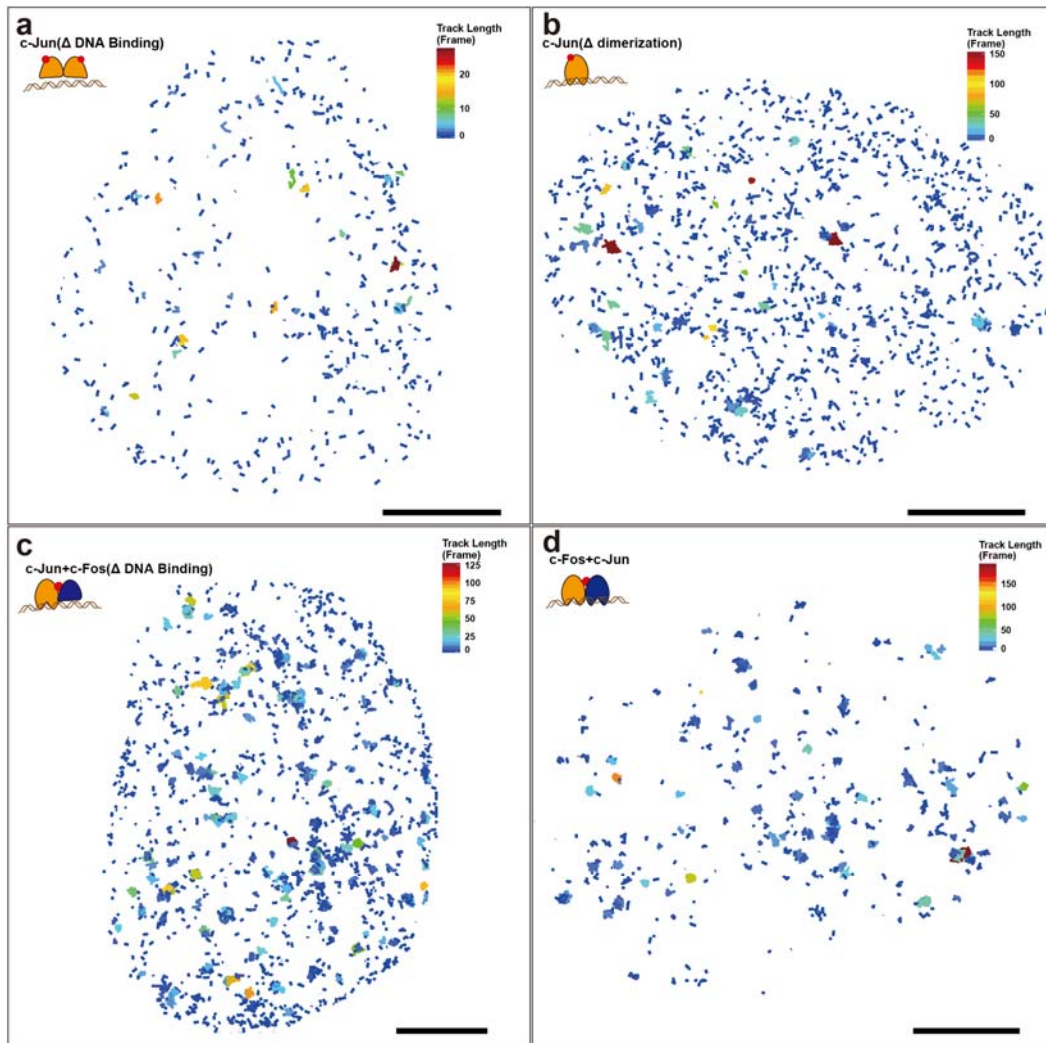

**Supplementary Figure 17. Single molecule trajectories of different c-Jun mutants that stable bind to chromatin.**

**(a).** Single molecule trajectories of c-Jun mutant incapable of binding to DNA but capable of forming dimer. The images were taken using long exposure time to filter out the free diffused molecules.

**(b).** Single molecule trajectories of c-Jun mutant incapable of forming dimer but capable of binding to DNA.

**(c).** c-Fos incapable of binding to DNA was forced to form dimer with c-Jun using split HaloTag.

**(d).** Wild type c-Fos was forced to form dimer with c-Jun using split HaloTag. The color of the trajectories represented different trajectory length.

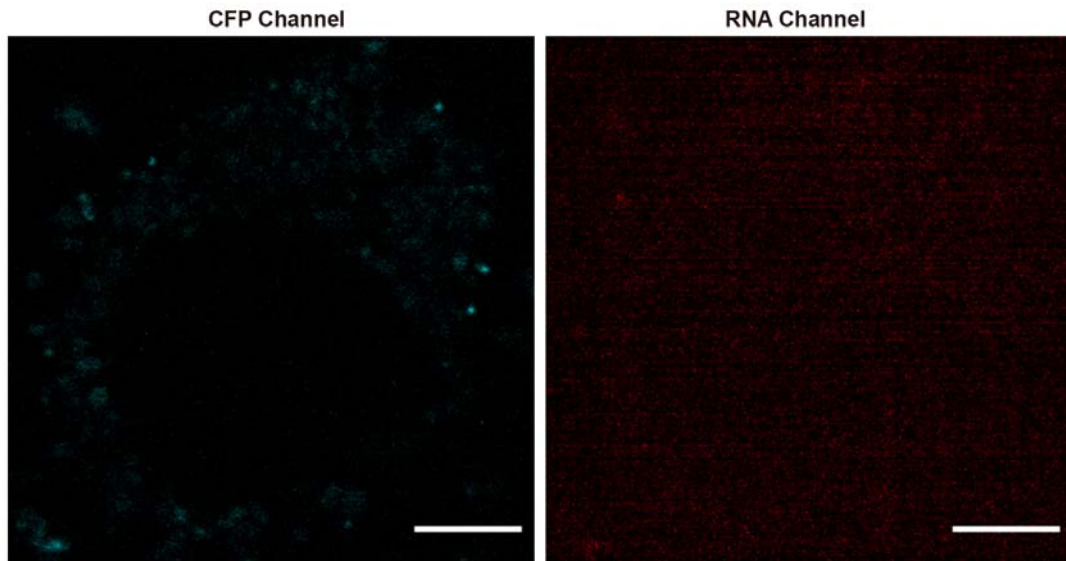

**Supplementary Figure 18. Specificity of mRNA labeling using TagBiFC.**

In the control cells without ECFP-1×MS2-PP7 transfection, no fluorescent puncta could be monitored.

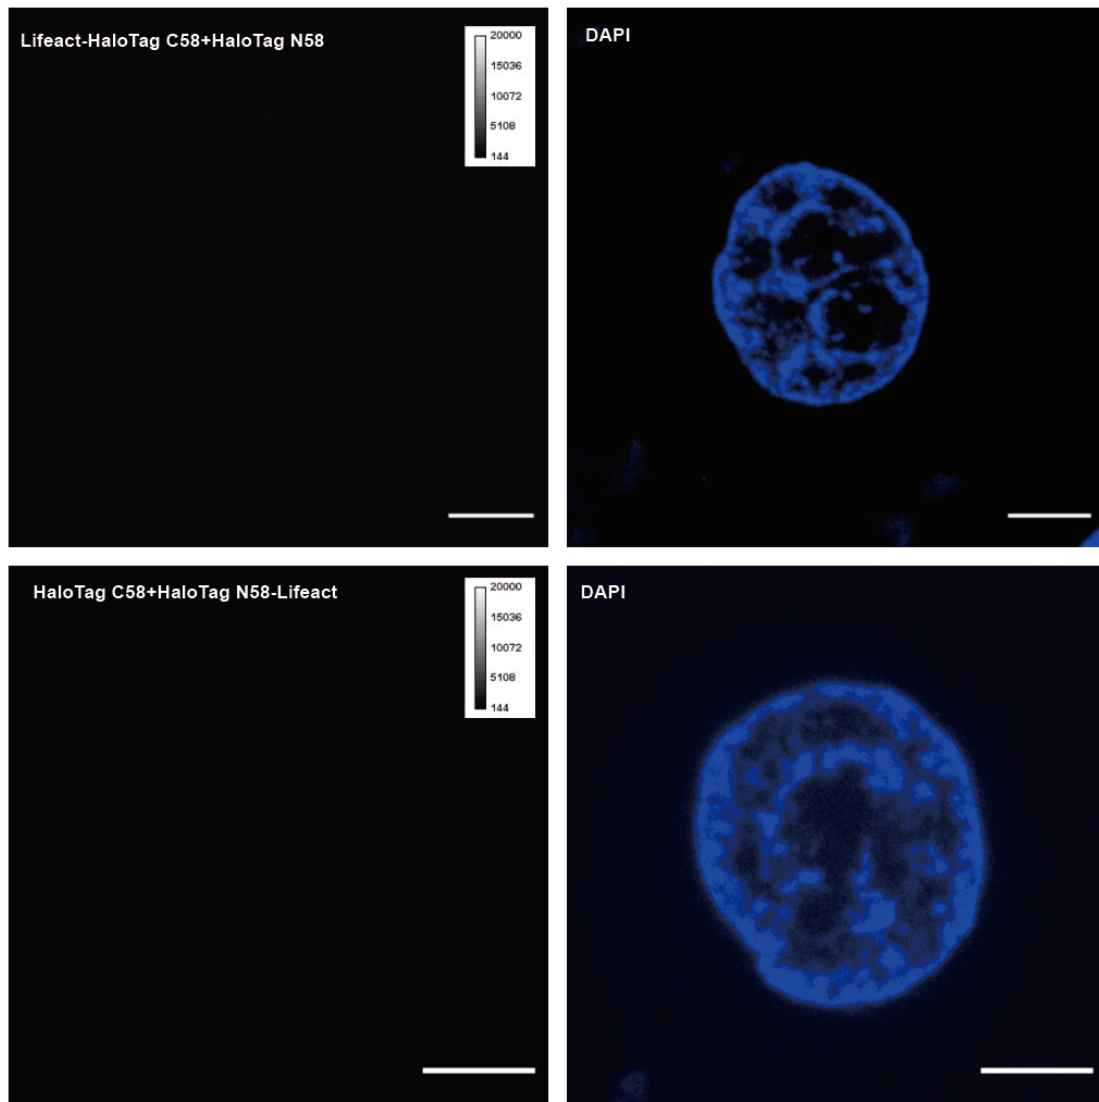

**Supplementary Figure 19. Over-expressed TagBiFC probes are invisible.**

We have used the cells transfected with Lifact-HaloTag C58 and HaloTag N58 or HaloTag N58-Lifact and HaloTag C58 as control experiments to Fig 6b. Both experiments show no actin fluorescence labeling or background signal since split HaloTag half without Lifact fusion can't bind to actin filament, indicating the background-free imaging of cellular structure using split HaloTag.

**Supplementary Table 1. Plasmids used in the manuscript**

| <b>Plasmid Name</b>                                      | <b>Source</b> |
|----------------------------------------------------------|---------------|
| pcDNA3.1(+)- $\beta$ -Fos-GS-HaloTag C19                 | This paper    |
| pcDNA3.1(+)- $\beta$ -Fos-GS-HaloTag C33                 | This paper    |
| pcDNA3.1(+)- $\beta$ -Fos-GS-HaloTag C48                 | This paper    |
| pcDNA3.1(+)- $\beta$ -Fos-GS-HaloTag C58                 | This paper    |
| pcDNA3.1(+)- $\beta$ -Fos-GS-HaloTag C78                 | This paper    |
| pcDNA3.1(+)- $\beta$ -Fos-GS-HaloTag C98                 | This paper    |
| pcDNA3.1(+)- $\beta$ -Fos-GS-HaloTag C121                | This paper    |
| pcDNA3.1(+)- $\beta$ -Fos-GS-HaloTag C141                | This paper    |
| pcDNA3.1(+)- $\beta$ -Fos-GS-HaloTag C156                | This paper    |
| pcDNA3.1(+)- $\beta$ -Fos-GS-HaloTag C166                | This paper    |
| pcDNA3.1(+)- $\beta$ -Fos-GS-HaloTag C180                | This paper    |
| pcDNA3.1(+)- $\beta$ -Fos-GS-HaloTag C207                | This paper    |
| pcDNA3.1(+)- $\beta$ -Fos-GS-HaloTag C234                | This paper    |
| pcDNA3.1(+)- $\beta$ -Fos-GS-HaloTag C244                | This paper    |
| pcDNA3.1(+)- $\beta$ -Fos-GS-HaloTag C261                | This paper    |
| pcDNA3.1(+)- $\beta$ -Fos-GS-HaloTag C269                | This paper    |
| pcDNA3.1(+)- $\beta$ -Fos-GS-HaloTag C278                | This paper    |
| pcDNA3.1(+)-HaloTag N19-GS- $\beta$ -Jun                 | This paper    |
| pcDNA3.1(+)-HaloTag N33-GS- $\beta$ -Jun                 | This paper    |
| pcDNA3.1(+)-HaloTag N48-GS- $\beta$ -Jun                 | This paper    |
| pcDNA3.1(+)-HaloTag N58-GS- $\beta$ -Jun                 | This paper    |
| pcDNA3.1(+)-HaloTag N78-GS- $\beta$ -Jun                 | This paper    |
| pcDNA3.1(+)-HaloTag N98-GS- $\beta$ -Jun                 | This paper    |
| pcDNA3.1(+)-HaloTag N121-GS- $\beta$ -Jun                | This paper    |
| pcDNA3.1(+)-HaloTag N141-GS- $\beta$ -Jun                | This paper    |
| pcDNA3.1(+)-HaloTag N156-GS- $\beta$ -Jun                | This paper    |
| pcDNA3.1(+)-HaloTag N166-GS- $\beta$ -Jun                | This paper    |
| pcDNA3.1(+)-HaloTag N180-GS- $\beta$ -Jun                | This paper    |
| pcDNA3.1(+)-HaloTag N207-GS- $\beta$ -Jun                | This paper    |
| pcDNA3.1(+)-HaloTag N234-GS- $\beta$ -Jun                | This paper    |
| pcDNA3.1(+)-HaloTag N244-GS- $\beta$ -Jun                | This paper    |
| pcDNA3.1(+)-HaloTag N261-GS- $\beta$ -Jun                | This paper    |
| pcDNA3.1(+)-HaloTag N269-GS- $\beta$ -Jun                | This paper    |
| pcDNA3.1(+)-HaloTag N278-GS- $\beta$ -Jun                | This paper    |
| pcDNA3.1(+)-HaloTag N278-GS- $\beta$ -Jun                | This paper    |
| pcDNA3.1(+)- $\beta$ -Fos ( $\Delta$ Zip)-GS-HaloTag C19 | This paper    |

|                                                           |                                                                   |
|-----------------------------------------------------------|-------------------------------------------------------------------|
| pcDNA3.1(+)- $\beta$ -Fos ( $\Delta$ Zip)-GS-HaloTag C33  | This paper                                                        |
| pcDNA3.1(+)- $\beta$ -Fos ( $\Delta$ Zip)-GS-HaloTag C48  | This paper                                                        |
| pcDNA3.1(+)- $\beta$ -Fos ( $\Delta$ Zip)-GS-HaloTag C58  | This paper                                                        |
| pcDNA3.1(+)- $\beta$ -Fos ( $\Delta$ Zip)-GS-HaloTag C78  | This paper                                                        |
| pcDNA3.1(+)- $\beta$ -Fos ( $\Delta$ Zip)-GS-HaloTag C98  | This paper                                                        |
| pcDNA3.1(+)- $\beta$ -Fos ( $\Delta$ Zip)-GS-HaloTag C121 | This paper                                                        |
| pcDNA3.1(+)- $\beta$ -Fos ( $\Delta$ Zip)-GS-HaloTag C141 | This paper                                                        |
| pcDNA3.1(+)- $\beta$ -Fos ( $\Delta$ Zip)-GS-HaloTag C156 | This paper                                                        |
| pcDNA3.1(+)- $\beta$ -Fos ( $\Delta$ Zip)-GS-HaloTag C166 | This paper                                                        |
| pcDNA3.1(+)- $\beta$ -Fos ( $\Delta$ Zip)-GS-HaloTag C180 | This paper                                                        |
| pcDNA3.1(+)- $\beta$ -Fos ( $\Delta$ Zip)-GS-HaloTag C207 | This paper                                                        |
| pcDNA3.1(+)- $\beta$ -Fos ( $\Delta$ Zip)-GS-HaloTag C234 | This paper                                                        |
| pcDNA3.1(+)- $\beta$ -Fos ( $\Delta$ Zip)-GS-HaloTag C244 | This paper                                                        |
| pcDNA3.1(+)- $\beta$ -Fos ( $\Delta$ Zip)-GS-HaloTag C261 | This paper                                                        |
| pcDNA3.1(+)- $\beta$ -Fos ( $\Delta$ Zip)-GS-HaloTag C269 | This paper                                                        |
| pcDNA3.1(+)- $\beta$ -Fos ( $\Delta$ Zip)-GS-HaloTag C278 | This paper                                                        |
| pcDNA3.1(+)-c-Fos-GS-HaloTag C58                          | This paper                                                        |
| pcDNA3.1(+)-HaloTag N58-GS-c-Jun                          | This paper                                                        |
| pcDNA3.1(+)-FKBP-GS-HaloTag C58                           | This paper                                                        |
| pcDNA3.1(+)-HaloTag N58-GS-FRB                            | This paper                                                        |
| pcDNA3.1(+)-FKBP-GS-HaloTag C261                          | This paper                                                        |
| pcDNA3.1(+)-HaloTag C261-GS-FRB                           | This paper                                                        |
| pcDNA3.1(+)-c-Fos-GS-mMaple3 C174                         | This paper                                                        |
| pcDNA3.1(+)-mMaple3 N173-GS-c-Jun                         | This paper                                                        |
| pcDNA3.1(+)-tdPCP-GS-HaloTag C58                          | This paper                                                        |
| pcDNA3.1(+)-HaloTag N58-GS-tdMCP                          | This paper                                                        |
| pcDNA3.1(+)-Lifeact-GS-HaloTag C58                        | This paper                                                        |
| pcDNA3.1(+)-HaloTag N58-GS-lifeact                        | This paper                                                        |
| pcDNA3.1(+)-H2A-GS-HaloTag C58                            | This paper                                                        |
| pcDNA3.1(+)-HaloTag N58-GS-H3                             | This paper                                                        |
| pcDNA3.1(+)-HaloTag N58-GS-H2A.Z                          | This paper                                                        |
| pcDNA3.1(+)-CFP-1XMS2-PP7                                 | This paper                                                        |
| pB-TRE-1XMS2-PP7-EF1a-rtTA                                | This paper                                                        |
| pcDNA3.1(+)-Flag-c-Fos-HaloTag                            | This paper                                                        |
| pcDNA3.1(+)-Flag-c-Fos-HaloTag C58                        | This paper                                                        |
| pcDNA3.1(+)-Flag-HaloTag N 58-c-Fos                       | This paper                                                        |
| phage-cmv-cfp-24xpp7                                      | Wu et al Biophys J. 2012 Jun 20;102(12):2936-44. Epub 2012 Jun 19 |



## Protein sequence

## HaloTag N58:

MGSEIGTGFPDPHYVEVLGERMHYVDVGPRDGPVFLHGNPTSSYVWRNIIPHVAP

## HaloTag C58:

THRCIAPDLIGMGKSDKPDLYFFDDHVRFMDFIEALGLEEVVLIHDWGSALGFHWA  
KRNPERVKGI AFMEFIRPIPTWDEWPEFARETFQAFRTTDVGRKLIIDQNVFIEGTLPMGV  
VRPLTEVEMDHYREPFLNPVDREPLWRFPNELPIAGEPANIVALVEEYMDWLHQSPVPKL  
LFWGTPGVLIPPAEAARLAKSLPNCKAVDIGPGLNLLQEDNPDIGSEIARWLSTLEISG

**Supplementary Table 2. FISH probes for CFP**

| <b>Probe Name</b> | <b>Probe Sequence (5'-3')</b>               |
|-------------------|---------------------------------------------|
| Cy5-Primary       | Cy5-cgagctcgggtaccgggtcgCCC                 |
| CFP FISH1         | GGGcgaccgggtaccgagctcgtcctcgccttgctcacat    |
| CFP FISH2         | GGGcgaccgggtaccgagctcgtggcaccacccggggaac    |
| CFP FISH3         | GGGcgaccgggtaccgagctcgtcgccgtccagctgaccag   |
| CFP FISH4         | GGGcgaccgggtaccgagctcgggtgaacttggtgcccgtta  |
| CFP FISH5         | GGGcgaccgggtaccgagctcgcgccctcgcctcgcggac    |
| CFP FISH6         | GGGcgaccgggtaccgagctcggtcagcttccctaggtggc   |
| CFP FISH7         | GGGcgaccgggtaccgagctcgggtggtgcagatgaactca   |
| CFP FISH8         | GGGcgaccgggtaccgagctcggccaggcagggcagcttg    |
| CFP FISH9         | GGGcgaccgggtaccgagctcgcaggtcagggtggtcacgag  |
| CFP FISH10        | GGGcgaccgggtaccgagctcgtagcggctgaagcactgcac  |
| CFP FISH11        | GGGcgaccgggtaccgagctcgggtgcttctcatgtggtcgg  |
| CFP FISH12        | GGGcgaccgggtaccgagctcggcatggcggacttgaagaag  |
| CFP FISH13        | GGGcgaccgggtaccgagctcgcgctcctggacgtagccttc  |
| CFP FISH14        | GGGcgaccgggtaccgagctcgggtcgtccttgaagaagatgg |
| CFP FISH15        | GGGcgaccgggtaccgagctcggcgcgggtctttagttg     |
| CFP FISH16        | GGGcgaccgggtaccgagctcgggtcgcctcgaactcac     |
| CFP FISH17        | GGGcgaccgggtaccgagctcgtcagctcgtatcgggtcacc  |
| CFP FISH18        | GGGcgaccgggtaccgagctcgtcctccttgaagtgatgcc   |
| CFP FISH19        | GGGcgaccgggtaccgagctcgttgtccccaggatgttgc    |
| CFP FISH20        | GGGcgaccgggtaccgagctcgggctgatgtagtgtactcc   |
| CFP FISH21        | GGGcgaccgggtaccgagctcgtcggcggatgatagacgtt   |
| CFP FISH22        | GGGcgaccgggtaccgagctcgttgccttgccttcttctgct  |
| CFP FISH23        | GGGcgaccgggtaccgagctcgttggcggatcttgaagttg   |
| CFP FISH24        | GGGcgaccgggtaccgagctcgtgcacgtcgcctcctgat    |
| CFP FISH25        | GGGcgaccgggtaccgagctcgtttctgctgtagtggtcg    |
| CFP FISH26        | GGGcgaccgggtaccgagctcgcacgggcccgtcgcgatgg   |
| CFP FISH27        | GGGcgaccgggtaccgagctcgtcaggtagtggtgtcggg    |
| CFP FISH28        | GGGcgaccgggtaccgagctcgtttgctcaggcgggactgg   |
| CFP FISH29        | GGGcgaccgggtaccgagctcgtgatcgccttctctgtggg   |

|            |                                            |
|------------|--------------------------------------------|
| CFP FISH30 | GGGcgaccgggtaccgagctcgcacgaactccagcaggacca |
| CFP FISH31 | GGGcgaccgggtaccgagctcgcgagagtgatccggcggcg  |
| CFP FISH32 | GGGcgaccgggtaccgagctcgtactgtacagctcgtccat  |
