# Supplementary material for: TagBiFC technique allows long-term single-molecule tracking of protein-protein interactions in living cells
Source: PubMed Central journal article supplement (PMC7979928; doi:10.1038/s42003-021-01896-7), 2021-03-19
Supplement: 42003_2021_1896_MOESM2_ESM.pdf [file 42003_2021_1896_MOESM2_ESM.pdf]

## **Description of Additional Supplementary Files**

**File name:** Supplementary Data 1

**Description:** The Source data underlying Figure 1c and Figure 1g.

**File name:** Supplementary Data 2

**Description:** The Source data underlying Figure 2b-d.

**File name:** Supplementary Data 3

**Description:** The Source data underlying Figure 3a-j.

**File name:** Supplementary Data 4

**Description:** The Source data underlying Figure 4c-k.

**File name:** Supplementary Data 5

**Description:** The source data underlying Figure 5d and Figure 5j.
